# Supplementary material for: Highly stretchable and transparent ionic conducting elastomers
Source: PubMed Central journal article supplement (PMC6035269; doi:10.1038/s41467-018-05165-w), 2018-07-06
Supplement: 41467_2018_5165_MOESM3_ESM.pdf [file 41467_2018_5165_MOESM3_ESM.pdf]

## **Description of Additional Supplementary Files**

File Name: Supplementary Movie 1

Description: Demonstration of the adhesive property of ICE, when two pieces of ICE is attached together, the formed junction is hard to stretch apart.

File Name: Supplementary Movie 2

Description: A sensor detecting deformation by connecting to a LCR meter.

File Name: Supplementary Movie 3

Description: Demonstration of the sensitivity of the covered touch sensor
